# Supplementary material for: Characterization of protein species and weighted protein co-expression network regulation of Escherichia coli in response to serum killing using a 2-DE based proteomics approach
Source: Royal Society of Chemistry journal article supplement (doi:10.1039/c3mb70404a), 2013-11-12
Supplement: c3mb70404a_2.pdf [file c3mb70404a_2.pdf]

Supplementary Table 5 Statistics of proteins' amino acid proportion

| Type      | Shapiro-Wilk test<br>Protein<br>without species | Shapiro-Wilk test<br>Protein<br>with species | F-test<br>Protein<br>without species<br>/Protein with species | Mann-Whitney Test<br>Protein<br>without species<br>/Protein with species | T-test<br>Protein<br>without species<br>/Protein with species |
|-----------|-------------------------------------------------|----------------------------------------------|---------------------------------------------------------------|--------------------------------------------------------------------------|---------------------------------------------------------------|
| A = Ala   | 0.023                                           | 0.000                                        | 0.634                                                         | 0.736                                                                    |                                                               |
| C = Cys   | 0.000                                           | 0.000                                        | 0.001                                                         | 0.003                                                                    |                                                               |
| D = Asp   | 0.001                                           | 0.511                                        | 0.318                                                         | 0.604                                                                    |                                                               |
| E = Glu   | 0.000                                           | 0.015                                        | 0.020                                                         | 0.007                                                                    |                                                               |
| F = Phe   | 0.000                                           | 0.018                                        | 0.357                                                         | 0.342                                                                    |                                                               |
| G = Gly   | 0.000                                           | 0.011                                        | 0.027                                                         | 0.038                                                                    |                                                               |
| H = His   | 0.000                                           | 0.064                                        | 0.018                                                         | 0.039                                                                    |                                                               |
| I = Ile   | 0.000                                           | 0.581                                        | 0.159                                                         | 0.089                                                                    |                                                               |
| K = Lys   | 0.000                                           | 0.000                                        | 0.005                                                         | 0.000                                                                    |                                                               |
| L = Leu   | 0.067                                           | 0.110                                        | 0.000                                                         | 0.000                                                                    |                                                               |
| M = Met   | 0.000                                           | 0.295                                        | 0.642                                                         | 0.959                                                                    |                                                               |
| N = Asn   | 0.000                                           | 0.047                                        | 0.734                                                         | 0.852                                                                    |                                                               |
| P = Pro   | 0.270                                           | 0.489                                        | 0.021                                                         | 0.020                                                                    |                                                               |
| Q = Gln   | 0.000                                           | 0.006                                        | 0.005                                                         | 0.008                                                                    |                                                               |
| R = Arg   | 0.000                                           | 0.001                                        | 0.286                                                         | 0.136                                                                    |                                                               |
| S = Ser   | 0.000                                           | 0.068                                        | 0.471                                                         | 0.571                                                                    |                                                               |
| T = Thr   | 0.005                                           | 0.001                                        | 0.420                                                         | 0.417                                                                    |                                                               |
| V = Val   | 0.000                                           | 0.000                                        | 0.146                                                         | 0.290                                                                    |                                                               |
| W = Trp   | 0.000                                           | 0.000                                        | 0.017                                                         | 0.018                                                                    |                                                               |
| Y = Tyr   | 0.000                                           | 0.000                                        | 0.786                                                         | 0.419                                                                    |                                                               |
| Acidic    | 0.000                                           | 0.027                                        | 0.167                                                         | 0.053                                                                    |                                                               |
| Aliphatic | 0.005                                           | 0.142                                        | 0.744                                                         | 0.594                                                                    |                                                               |
| Aromatic  | 0.186                                           | 0.240                                        | 0.219                                                         | 0.314                                                                    | 0.219                                                         |
| Basic     | 0.000                                           | 0.000                                        | 0.045                                                         | 0.005                                                                    |                                                               |
| Charged   | 0.000                                           | 0.024                                        | 0.036                                                         | 0.004                                                                    |                                                               |
| Non-polar | 0.000                                           | 0.173                                        | 0.355                                                         | 0.134                                                                    |                                                               |
| Polar     | 0.000                                           | 0.168                                        | 0.347                                                         | 0.125                                                                    |                                                               |
| Small     | 0.002                                           | 0.092                                        | 0.807                                                         | 0.993                                                                    |                                                               |
| Tiny      | 0.140                                           | 0.424                                        | 0.404                                                         | 0.323                                                                    | 0.404                                                         |
