# Supplementary material for: Characterization of protein species and weighted protein co-expression network regulation of Escherichia coli in response to serum killing using a 2-DE based proteomics approach
Source: Royal Society of Chemistry journal article supplement (doi:10.1039/c3mb70404a), 2013-11-12
Supplement: c3mb70404a_3.pdf [file c3mb70404a_3.pdf]

Supplementary Table 7 Statistics of proteins' conservation

| Type                       | Shapiro-Wilk test<br>Protein without species | Shapiro-Wilk test<br>Protein with species | F-test<br>Protein without species/Protein with species | Mann-Whitney Test<br>Protein without species/Protein with species |
|----------------------------|----------------------------------------------|-------------------------------------------|--------------------------------------------------------|-------------------------------------------------------------------|
| <i>V. Parahaemolyticus</i> | 0.0000                                       | 0.0000                                    | 0.0038                                                 | 0.0002                                                            |
| <i>L. pneumophila</i>      | 0.0000                                       | 0.0000                                    | 0.0003                                                 | 0.0001                                                            |
| <i>C. tetani</i>           | 0.0005                                       | 0.0024                                    | 0.0331                                                 | 0.0318                                                            |
| <i>S. aureus</i>           | 0.0013                                       | 0.0530                                    | 0.0082                                                 | 0.0096                                                            |
| Overall average distance   | 0.0881                                       | 0.0133                                    | 0.0007                                                 | 0.0012                                                            |
