# Supplementary material for: Characterization of protein species and weighted protein co-expression network regulation of Escherichia coli in response to serum killing using a 2-DE based proteomics approach
Source: Royal Society of Chemistry journal article supplement (doi:10.1039/c3mb70404a), 2013-11-12
Supplement: c3mb70404a_4.pdf [file c3mb70404a_4.pdf]

### Supplementary Table 10 KEGG pathways enriched in the brown module

| Term                                                 | <i>P</i> Value |
|------------------------------------------------------|----------------|
| eco00970:Aminoacyl-tRNA biosynthesis                 | 0.000          |
| eco00020:Citrate cycle (TCA cycle)                   | 0.000          |
| eco00620:Pyruvate metabolism                         | 0.000          |
| eco00010:Glycolysis / Gluconeogenesis                | 0.000          |
| eco00650:Butanoate metabolism                        | 0.000          |
| eco00190:Oxidative phosphorylation                   | 0.000          |
| eco00910:Nitrogen metabolism                         | 0.000          |
| eco03010:Ribosome                                    | 0.000          |
| eco00630:Glyoxylate and dicarboxylate metabolism     | 0.000          |
| eco00380:Tryptophan metabolism                       | 0.001          |
| eco00680:Methane metabolism                          | 0.001          |
| eco00250:Alanine, aspartate and glutamate metabolism | 0.001          |
| eco00240:Pyrimidine metabolism                       | 0.002          |
| eco00430:Taurine and hypotaurine metabolism          | 0.004          |
| eco00860:Porphyrin and chlorophyll metabolism        | 0.006          |
