# Supplementary material for: Characterization of protein species and weighted protein co-expression network regulation of Escherichia coli in response to serum killing using a 2-DE based proteomics approach
Source: Royal Society of Chemistry journal article supplement (doi:10.1039/c3mb70404a), 2013-11-12
Supplement: c3mb70404a_5.pdf [file c3mb70404a_5.pdf]

Supplementary Table 9 Statistics of proteins' intramodular connectivity

| Module    | Shapiro-Wilk test<br>Control | Shapiro-Wilk test<br>Serum | F-test<br>Serum/Control | Mann-Whitney Test<br>Serum/Control |
|-----------|------------------------------|----------------------------|-------------------------|------------------------------------|
| Blue      | 0.000                        | 0.000                      | 0.823                   | 0.487                              |
| Brown     | 0.000                        | 0.000                      | 0.000                   | 0.000                              |
| Turquoise | 0.000                        | 0.000                      | 0.731                   | 0.217                              |
| Yellow    | 0.000                        | 0.000                      | 0.981                   | 0.066                              |
